# Supplementary material for: A dual-excited and dual near-infrared emission phosphor Mg14Ge5O24:Cr3+,Cr4+ with a super broad band for biological detection
Source: Royal Society of Chemistry journal article supplement (doi:10.1039/d0dt03554h), 2020-11-19
Supplement: d0dt03554h1.pdf [file d0dt03554h1.pdf]

## Supporting Information

Xuejiao Wang, Zhijun Wang\*, Mingjie Zheng, Jia Cui, Yao Yao, Lingwei Cao, Mengya Zhang, Zhibin Yang, Hao Suo\*, Panlai Li\*

National-Local Joint Engineering Laboratory of New Energy Photoelectric Devices, Hebei Key Laboratory of Optic-electronic Information and Materials, College of Physics Science & Technology, Hebei University, Baoding 071002, China. E-mail: [\\*wangzj1998@126.com](mailto:wangzj1998@126.com). [\\*suo@hbu.edu.cn](mailto:suo@hbu.edu.cn) [\\*li\\_panlai@126.com](mailto:li_panlai@126.com)

| x                                           | 0.01         | 0.03     | 0.07     | 0.10     |
|---------------------------------------------|--------------|----------|----------|----------|
| <b>Crystal system</b>                       | Orthorhombic |          |          |          |
| <b>Space group</b>                          | Pbam         |          |          |          |
| <b>Cell parameters</b>                      |              |          |          |          |
| <b>a</b>                                    | 14.51929     | 14.52059 | 14.52347 | 14.52344 |
| <b>b</b>                                    | 10.22728     | 10.22709 | 10.22868 | 10.22807 |
| <b>c</b>                                    | 5.94895      | 5.94883  | 5.94933  | 5.94871  |
| <b>Cell volume (Å<sup>3</sup>)</b>          | 882.754      | 883.421  | 883.808  | 883.662  |
| <b><math>\alpha=\beta=\gamma</math> (°)</b> | 90           | 90       | 90       | 90       |
| <b><math>\chi^2</math></b>                  | 4.032        | 5.125    | 4.539    | 4.735    |
| <b>Rp</b>                                   | 8.36         | 9.56     | 9.03     | 9.54     |
| <b>Rwp</b>                                  | 12.75        | 14.36    | 13.55    | 14.06    |

Table S1. Refined crystallographic data of Mg<sub>14</sub>Ge<sub>5</sub>O<sub>24</sub>: xCr (MGO: xCr).

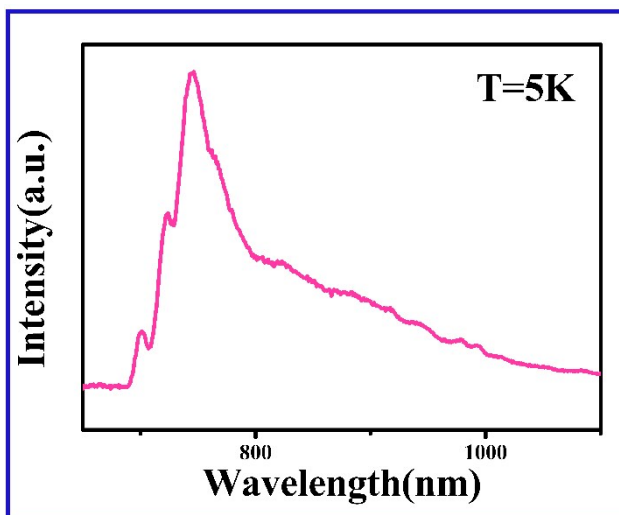

Fig. S1. Low temperature spectrum of MGO: 0.10Cr at T=5K ( $\lambda_{ex}$ =420 nm)
